# Supplementary material for: Complex Clonal Diversity ofStaphylococcus aureusNasal Colonization among Community Personnel, Healthcare Workers, and Clinical Students in the Eastern Province, Saudi Arabia
Source: Hindawi journal article supplement (doi:10.1155/2018/4208762), 2018-12-18

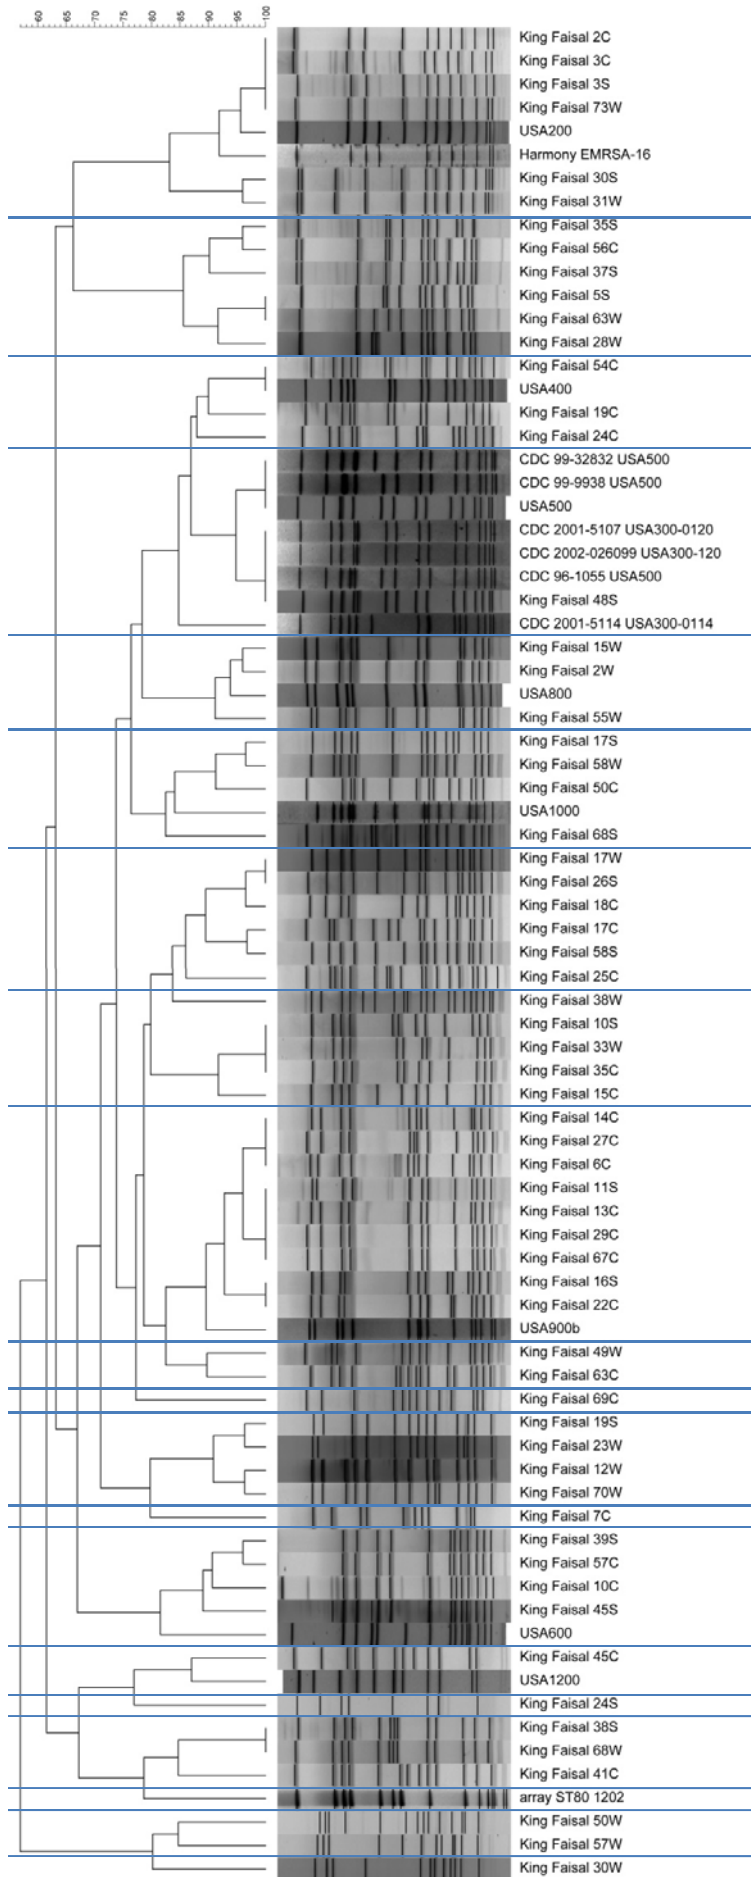

Supplement: f1 [file 4208762.f1.pdf]
